# Supplementary material for: 3,4-Methylenedithiopyrrole: convenient synthesis and application as a novel monomer for electroactive polymers
Source: Royal Society of Chemistry journal article supplement (doi:10.1039/b500937e), 2005-01-01

### 3,4-Methylenedithiopyrrole: convenient synthesis and application as a novel monomer for electroactive polymers

Hongchao Li and Christoph Lambert\*

Electronic Supplementary Information:

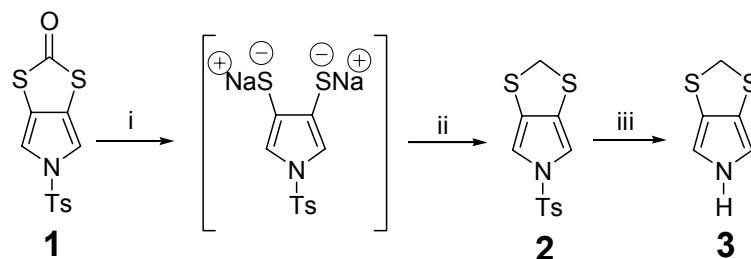

**Scheme 1** (i) MeONa, MeOH-THF, reflux; (ii) CH<sub>2</sub>Cl<sub>2</sub>; (iii) MeONa, MeOH-THF, reflux.

N-Tosyl-(1,3)-dithiolo[4,5-*c*]pyrrole-2-thione (0.1557 g, 0.5 mmol) was dissolved in 16 mL of anhydrous THF-MeOH (1:1 v/v) and degassed (N<sub>2</sub>, 30 min) before addition of sodium methoxide (5 M in MeOH, 10 mmol). The yellow solution was refluxed for 60 min and cooled down, 1 mL of dichloromethane was added to the resulted orange reaction mixture and the mixture was stirred at room temperature for 60 min. The reaction was stopped by addition of H<sub>2</sub>O (100 mL) and extracted with dichloromethane. The combined organic phase was washed with H<sub>2</sub>O and dried over anhydrous MgSO<sub>4</sub>. After concentration in vacuum, the crude product was purified by column chromatography (silica gel, CH<sub>2</sub>Cl<sub>2</sub>/petrom ether 1:2) to give 0.096 g of white solid product **2** in 65% yield.

<sup>1</sup>H NMR (CDCl<sub>3</sub>) δ 2.35 (s, 3H, Ph-CH<sub>3</sub>), 4.60 (s, 2H, -SCH<sub>2</sub>S-), 6.78 (s, 2H, Py-H), 7.24 (d, 2H, aromatic H), 7.65 (d, 2H, aromatic H).  
MS (EI) *m/z* 297 (M<sup>+</sup>, 100), 142 (M<sup>+</sup>-Ts, 77%).

The obtained **2** (0.32 mmol) was refluxed in MeOH-THF (10 mL, 1/1 v/v) in the presence of MeONa (6.4 mmol) for another 60 min before addition of H<sub>2</sub>O, and the pH of the reaction mixture was adjusted to pH = 7 by addition of 4 M HCl. The mixture was extracted with CH<sub>2</sub>Cl<sub>2</sub>, and the combined organic phases were dried over anhydrous MgSO<sub>4</sub>. After concentration in vacuum, the crude product was purified by column chromatography (silica gel, CH<sub>2</sub>Cl<sub>2</sub>/petrom ether 1:1) to give 0.039 g (yield 85 %) of 3,4-methylenedithiopyrrole as colourless crystals.

<sup>1</sup>H NMR (acetone-*d*<sub>6</sub>) δ 4.52 (s, 2H, -SCH<sub>2</sub>S-), 6.38 (s, 2H, Py-H), 9.62 (b, 1H, NH).  
<sup>13</sup>C NMR (acetone-*d*<sub>6</sub>) δ 124.9, 113.8, 48.7.  
MS (EI) *m/z* 143 (M<sup>+</sup>, 100).

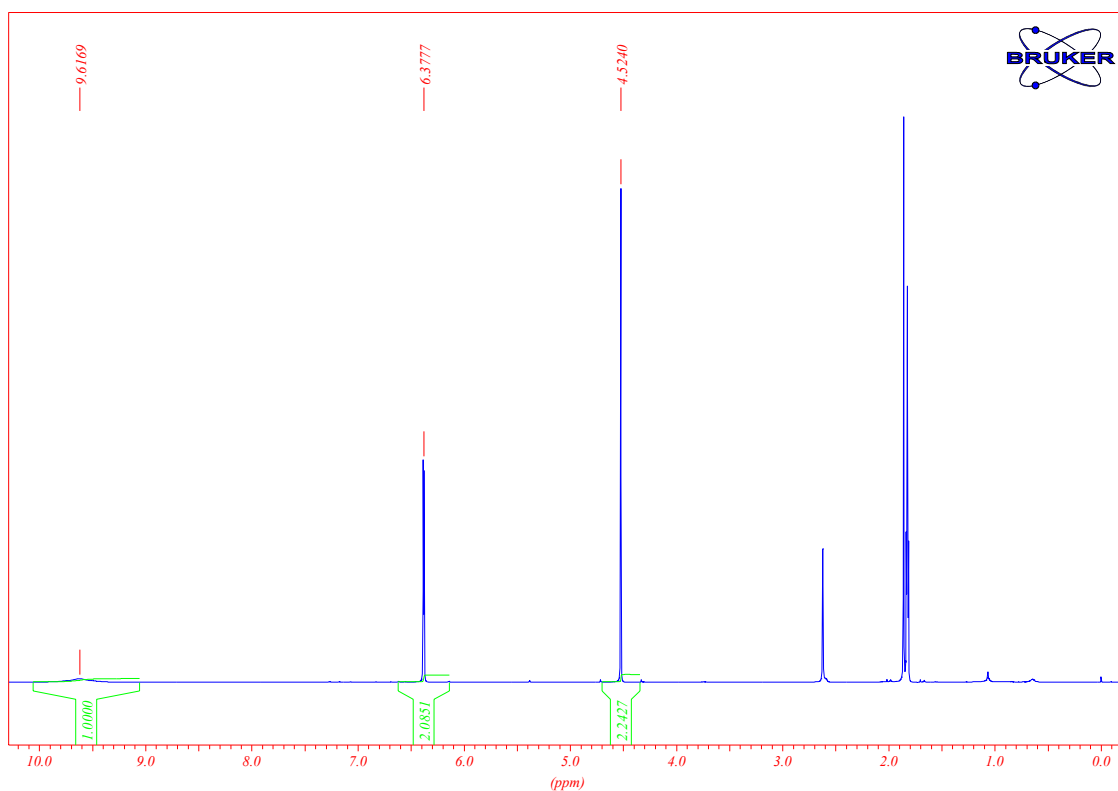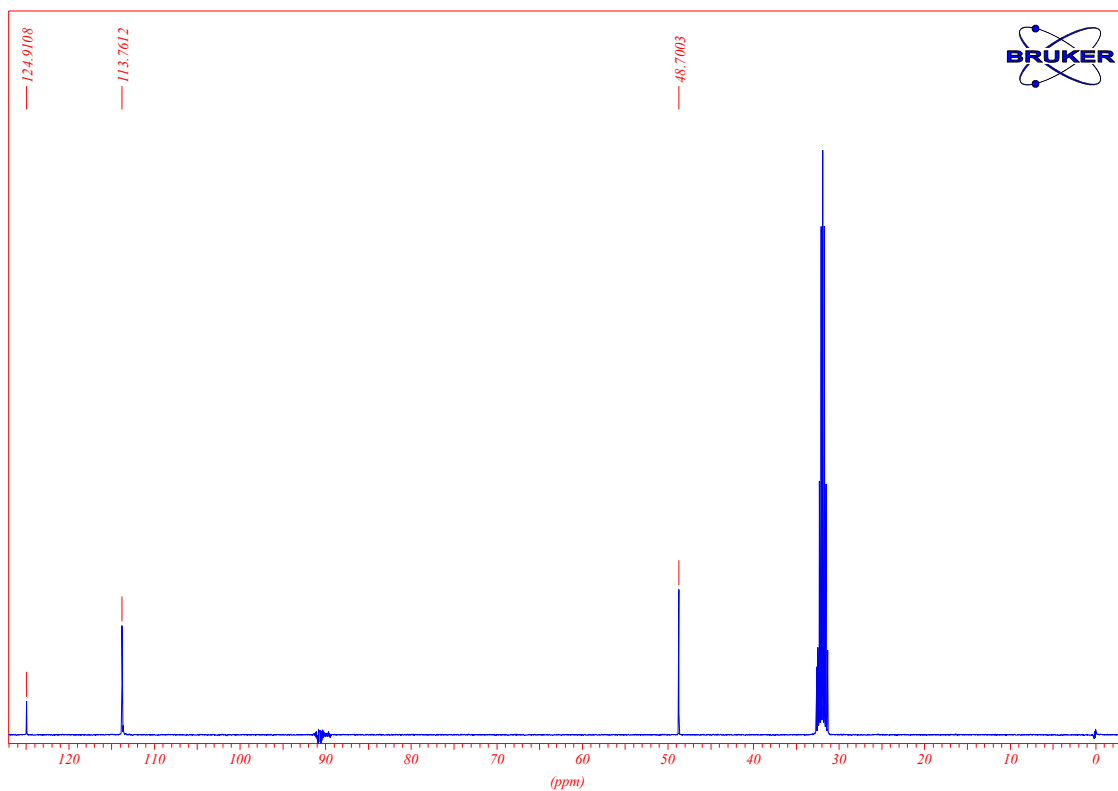

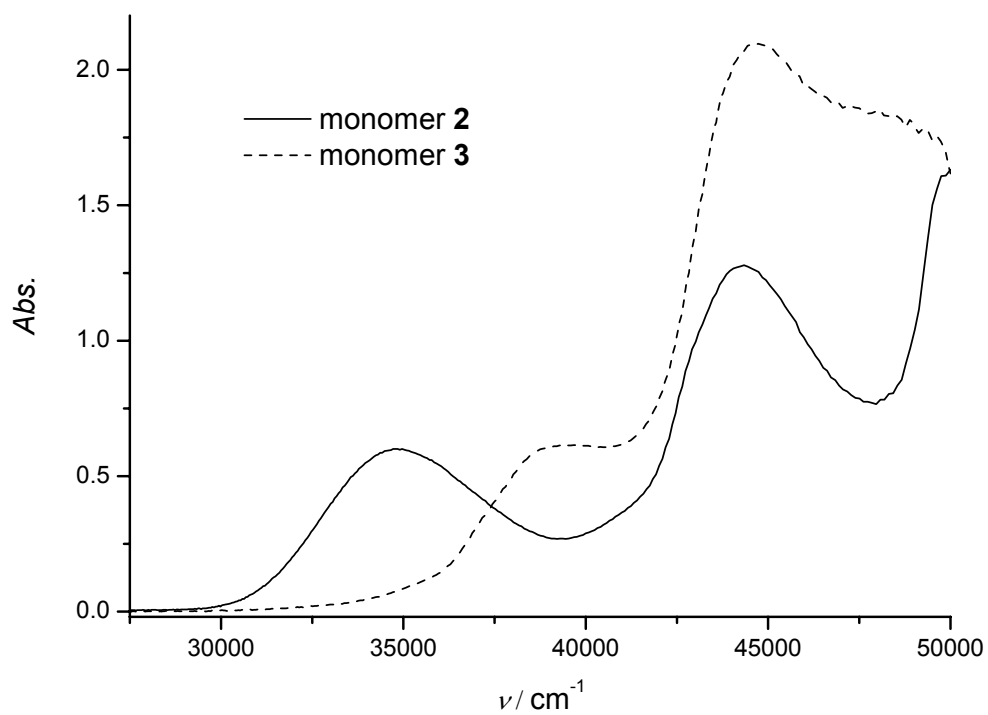

Supplement: b500937e.pdf [file b500937e.pdf]
